# Supplementary material
Source: PubMed Central journal article supplement (PMC5951386)

## Supplemental Figure 1

| Characteristics | No of patients 109 (%) |
|-----------------|------------------------|
| Age             |                        |
| Median (range)  | 67 years (29-86)       |
| Gender          |                        |
| Male            | 55 (50.5)              |
| Female          | 54 (49.5)              |
| Grade           |                        |
| 1               | 5 (4.6)                |
| 2               | 77 (70.6)              |
| 3               | 27 (24.8)              |
| Follow-up       |                        |
| Median (range)  | 560 days (80-3421)     |
| Vital Status    |                        |
| Alive           | 17 (15.6)              |
| Dead            | 90 (82.6)              |
| Unknown         | 2 (1.8)                |
| TNM Stage       |                        |
| I               | 7 (6.4)                |
| II              | 93 (85.3)              |
| III             | 6 (5.5)                |
| IV              | 3 (2.8)                |

# Supplemental Figure 2

A.

|                         |          |         |         |         |        |         |         |          |         |        |     |
|-------------------------|----------|---------|---------|---------|--------|---------|---------|----------|---------|--------|-----|
| B cells                 | BTLA     | CD79A   |         |         |        |         |         |          |         |        |     |
| CD4+ Regulatory T cells | FOXP3    | IL5     | CTLA4   | IL32    | IL4    |         |         |          |         |        |     |
| CD8+ T cells            | CD8A     |         |         |         |        |         |         |          |         |        |     |
| Macrophages             | MMP9     | CLEC5A  | CD68    | CYBB    |        |         |         |          |         |        |     |
| Neutrophils             | MNDA     |         |         |         |        |         |         |          |         |        |     |
| pDCs                    | CLEC4C   | IL3RA   | IRF8    | IRF7    | GZMB   | CXCR3   |         |          |         |        |     |
| MHC Class I             | HLA-A    | TAP1    |         |         |        |         |         |          |         |        |     |
| Co-stimulation, APC     | ICOSLG   | CD70    | TNFSF14 | CD40    | TNFSF9 | TNFSF4  | TNFSF15 | TNFSF18  | TNFSF8  | SLAMF1 |     |
| Co-stimulation, T cell  | ICOS     | CD28    | CD27    | TNFSF14 | CD40LG | TNFRSF9 | TNFRSF4 | TNFRSF18 | TNFRSF8 | SLAMF1 | CD2 |
| Co-inhibition, APC      | PDCD1LG2 | CD274   | LGALS9  |         |        |         |         |          |         |        |     |
| Co-inhibition, T cell   | LAG3     | CTLA4   | CD274   | CD160   | BTLA   | HAVCR2  | CD244   |          |         |        |     |
| Type I IFN Reponse      | MX1      | TNFSF10 | IFIT2   | IRF7    |        |         |         |          |         |        |     |
| Cytolytic Activity      | GZMA     | PRF1    |         |         |        |         |         |          |         |        |     |

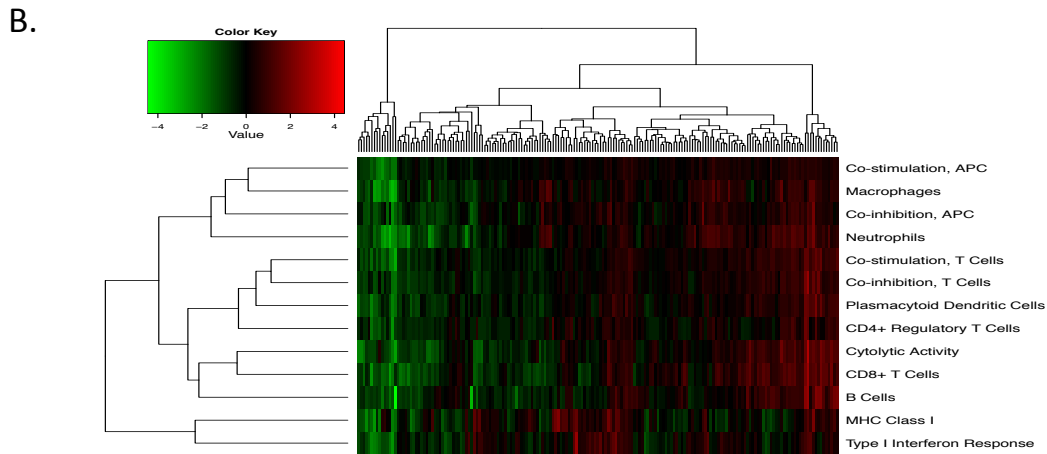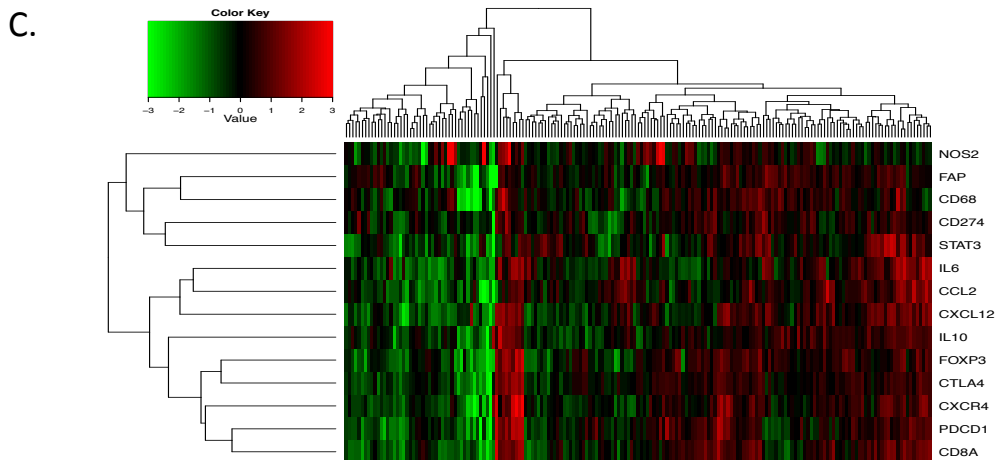

# Supplemental Figure 3

A.

| BIOMARKER    | MEDIAN SURVIVAL |              |        |
|--------------|-----------------|--------------|--------|
|              | Immature        | Intermediate | Mature |
| Stromal Type | 281             | 656          | 1033   |

| BIOMARKER                      | MEDIAN SURVIVAL |      |                  |
|--------------------------------|-----------------|------|------------------|
|                                | Low             | High | p-value (t-test) |
| Stromal Volume                 | 456             | 798  | 0.001474099      |
| Stromal MCT4                   | 1047            | 519  | 0.010447748      |
| Stromal CA9                    | 677             | 308  | 0.000378199      |
| Peri-T Lymphocytes             | 790             | 471  | 0.084930213      |
| Tumor Infiltrating Lymphocytes | 671             | 463  | 0.261042864      |
| CD8+ Cells                     | 560             | 657  | 0.572872502      |
| CD68+ Cells                    | 765             | 377  | 0.004253504      |
| CD163+ Cells                   | 799             | 356  | 0.000274149      |
| CTLA4+ Cells                   | 677             | 446  | 0.102871863      |
| FOXP3+ Cells                   | 705             | 476  | 0.176613338      |
| PDL1 - T                       | 656             | 431  | 0.303216601      |
| PDL1 - TME                     | 765             | 421  | 0.048030923      |
| PDL1 - Front                   | 705             | 463  | 0.221670219      |

B.

PDL1-Front

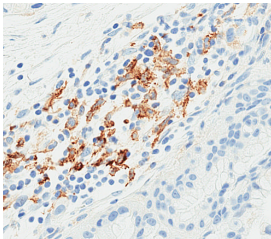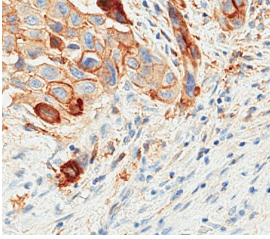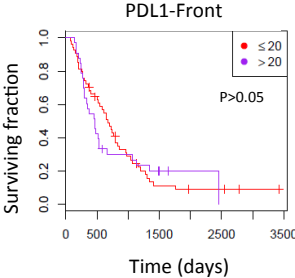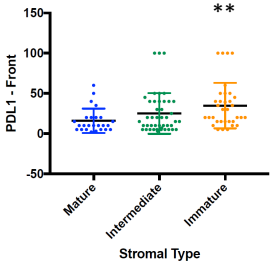

# Supplemental Figure 4

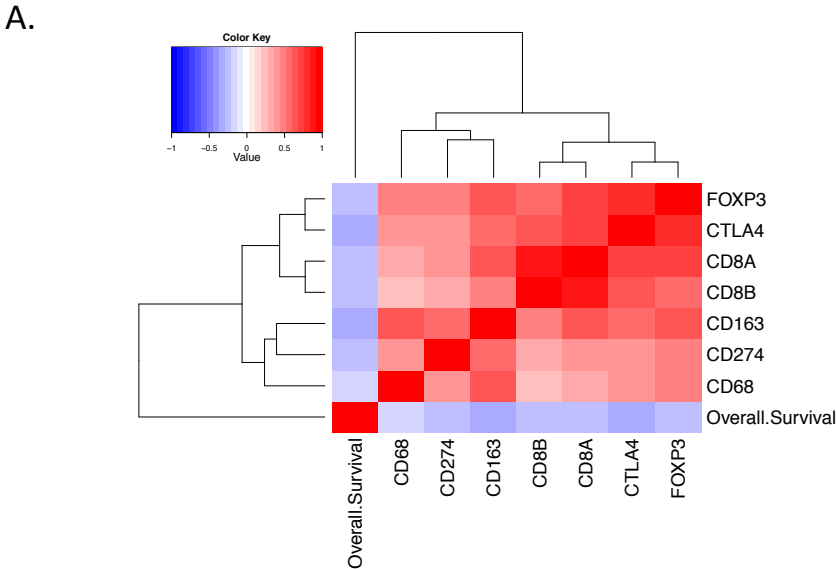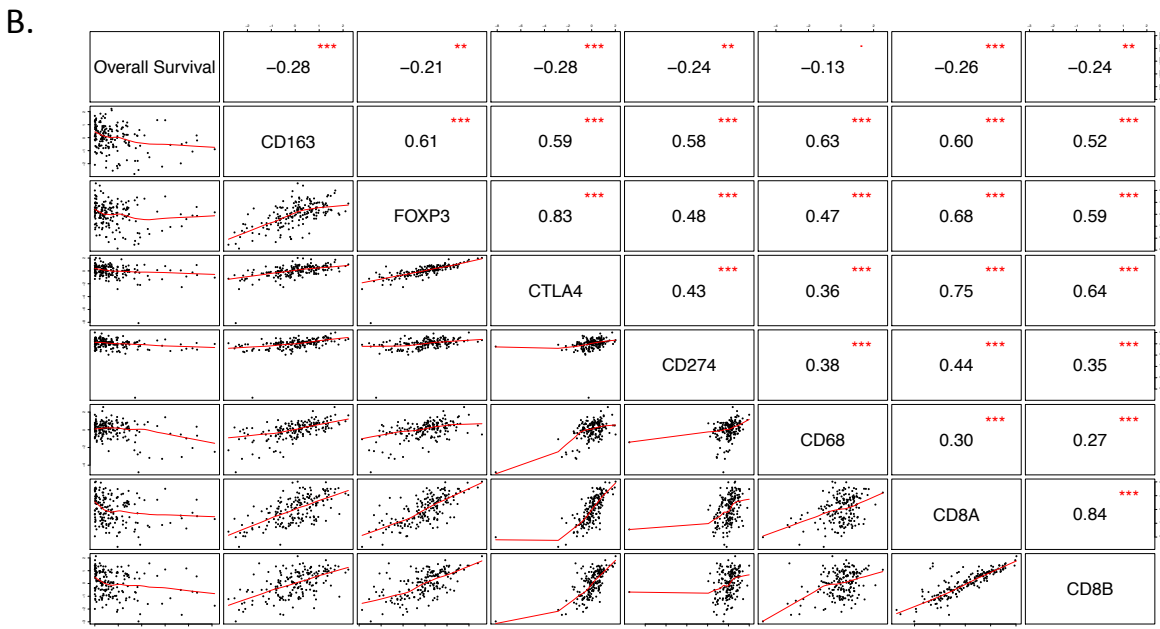

# Supplemental Figure 5

A.

| Legend for RF Heatmap |                                     |                                       |                                    |
|-----------------------|-------------------------------------|---------------------------------------|------------------------------------|
|                       | <span style="color: blue;">■</span> | <span style="color: orange;">■</span> | <span style="color: red;">■</span> |
| Stromal Volume        | ≤55                                 |                                       | >55                                |
| Stroma Type           | <i>mature</i>                       | <i>intermediate</i>                   | <i>immature</i>                    |
| MCT4 stroma           | 0                                   |                                       | 1 or 2                             |
| CA9 stroma            | 0                                   |                                       | 1 or 2                             |
| PDL1 T                | 0 or 1                              |                                       | 2                                  |
| PDL1 TME              | <i>absent</i>                       |                                       | <i>present</i>                     |
| CTLA4 Lymph           | ≤1                                  |                                       | >1                                 |
| PeriT Lymph           | <i>none, sparse, mild</i>           |                                       | <i>moderate, intense</i>           |
| Stromal TIL           | ≤15                                 |                                       | >15                                |
| PDL1 front            | ≤20                                 |                                       | >20                                |
| CD163                 | ≤30                                 |                                       | >30                                |
| CD8                   | ≤15                                 |                                       | >15                                |
| FoxP3                 | ≤14                                 |                                       | >14                                |
| CD68                  | ≤40                                 |                                       | >40                                |
| NACnt                 | ≤24                                 |                                       | >24                                |
| MissenseCnt           | ≤47                                 |                                       | >47                                |
| TotalMutCnt           | ≤54                                 |                                       | >54                                |

B.

| BIOMARKER  | MEDIAN SURVIVAL (DAYS) |           |           |           |
|------------|------------------------|-----------|-----------|-----------|
|            | Cluster 1              | Cluster 2 | Cluster 3 | Cluster 4 |
| RFClusters | 300                    | 405       | 600.5     | 1068.5    |
|            | Clusters 1, 2, 3       |           |           | Cluster 4 |
| RFClusters | 463                    |           |           | 1068.5    |

C.

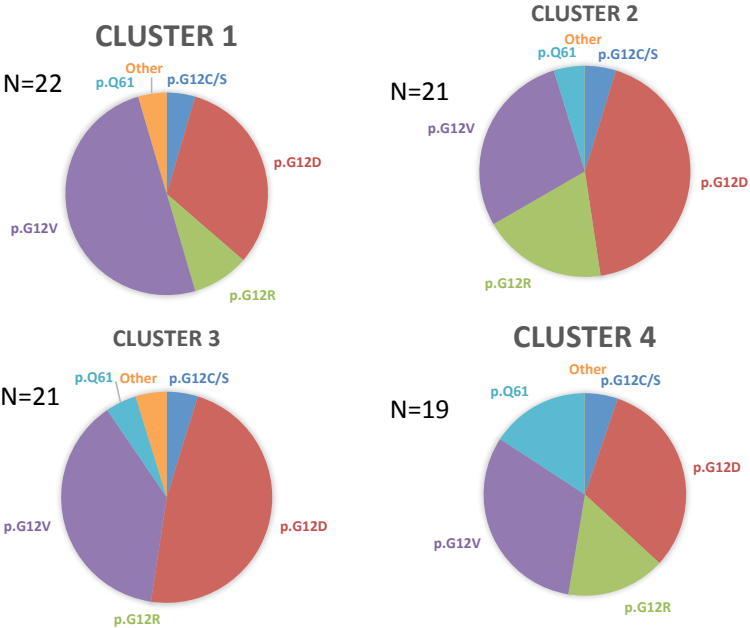

Supplement: NIHMS862034-supplement-2.pdf [file NIHMS862034-supplement-2.pdf]
